# Supplementary material for: The Smartphone Addiction Scale: Development and Validation of a Short Version for Adolescents
Source: PLoS One. 2013 Dec 31;8(12):e83558. doi: 10.1371/journal.pone.0083558 (PMC3877074; doi:10.1371/journal.pone.0083558)
Supplement: Appendix S1 — English version of SAS-SV. (XLSX) [file pone.0083558.s001.xlsx]

## Sheet: Sheet1
Appendix 1. English Version of SAS-SV
Items		Strongly disagree	Disagree	Weakly disagree	Weakly agree	Agree	Strongly agree
1	Missing planned work due to smartphone use	1	2	3	4	5	6
2	Having a hard time concentrating in class, while doing assignments, or while working due to smartphone use	1	2	3	4	5	6
3	Feeling pain in the wrists or at the back of the neck while using a smartphone	1	2	3	4	5	6
4	Won’t be able to stand not having a smartphone	1	2	3	4	5	6
5	Feeling impatient and fretful when I am not holding my smartphone	1	2	3	4	5	6
6	Having my smartphone in my mind even when I am not using it	1	2	3	4	5	6
7	I will never give up using my smartphone even when my daily life is already greatly affected by it.	1	2	3	4	5	6
8	Constantly checking my smartphone so as not to miss conversations between other people on Twitter or Facebook	1	2	3	4	5	6
9	Using my smartphone longer than I had intended	1	2	3	4	5	6
10	The people around me tell me that I use my smartphone too much.	1	2	3	4	5	6
